# Supplementary material for: Biological Solubilisation of Leather Industry Waste in Anaerobic Conditions: Effect of Chromium (III) Presence, Pre-Treatments and Temperature Strategies
Source: MDPI journal article supplement (doi:10.3390/ijms232113647), 2022-11-07
Supplement: s1 [file s1]

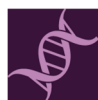

Supplementary Data

# Biological solubilisation of leather industry wastes in anaerobic conditions: Effect of Chromium (III) presence, pre-treatments and temperature strategies

Juana Fernández-Rodríguez <sup>1,\*</sup>, Beñat Lorea <sup>2</sup> and Gustavo González-Gaitano <sup>1,\*</sup>

<sup>1</sup> Department of Chemistry, Instituto de Biodiversidad y Medioambiente (BIOMA), University of Navarra, 31080 Pamplona, Spain

<sup>2</sup> Institute for Advanced Materials and Mathematics (INAMAT2), Department of Sciences, Public University of Navarre (UPNA), Campus de Arrosadía, 31006 Pamplona, Spain

\* Correspondence: juanafernandez@unav.es (J.F.-R.); gaitano@unav.es (G.G.-G.)

**Table S1.** Basic characterization of tannery solid wastes and inoculum.

|                                         | TS (%)     | VS (%) *   | % Organic content<br>** | Cr (III)<br>(mg/g) |
|-----------------------------------------|------------|------------|-------------------------|--------------------|
| <b>Inoculum</b>                         | 3.0 ± 0.3  | 1.9 ± 0.4  | 61.3 ± 0.9              | -                  |
| <b>Chrome-tanned leather shavings</b>   | 45.2 ± 1.0 | 42.5 ± 1.5 | 94.0 ± 1.9              | 18 ± 0.6           |
| <b>Chromium-free leather shavings</b>   | 51.2 ± 0.8 | 50.6 ± 1.4 | 98.8 ± 1.1              | -                  |
| <b>Particle Size Distribution (PSD)</b> |            |            |                         |                    |
| <b>Particle size (mm)</b>               | >4         | 2.5-4      | 1.25-2.5                | <1.25              |
| <b>% (mass)</b>                         | 40.9       | 27.8       | 6.2                     | 25.0               |

\* Over the total weight (wet weight). \*\* Over the dry weight (TS)

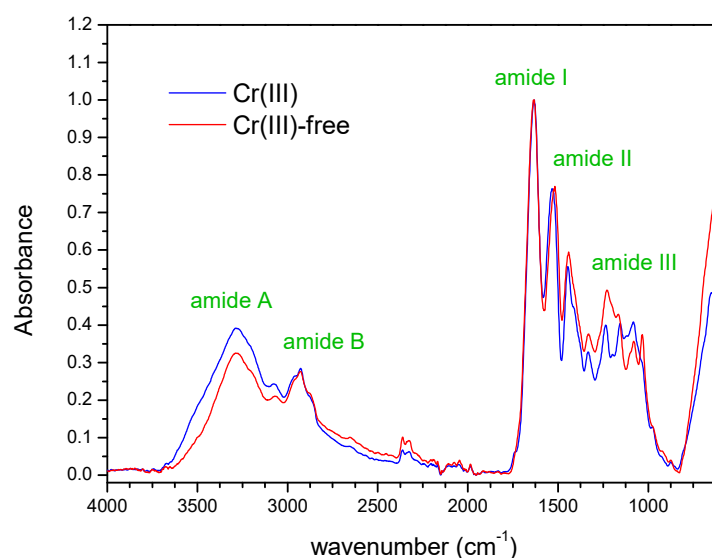

**Figure S1.** Normalized ATR-FTIR spectra of the as-received leather shavings.

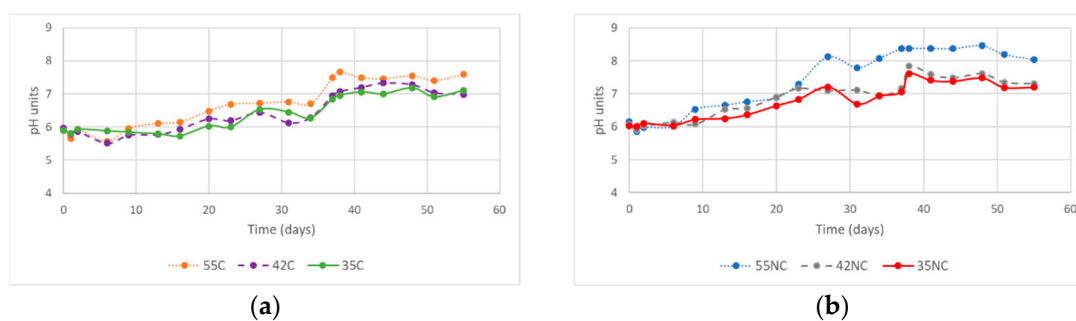

**Figure S2.** Evolution of pH at thermophilic (55°C), intermediate (42°C) and mesophilic (35°C) regimes: a) chrome-tanned (C); b) chromium-free (NC) leather shavings.

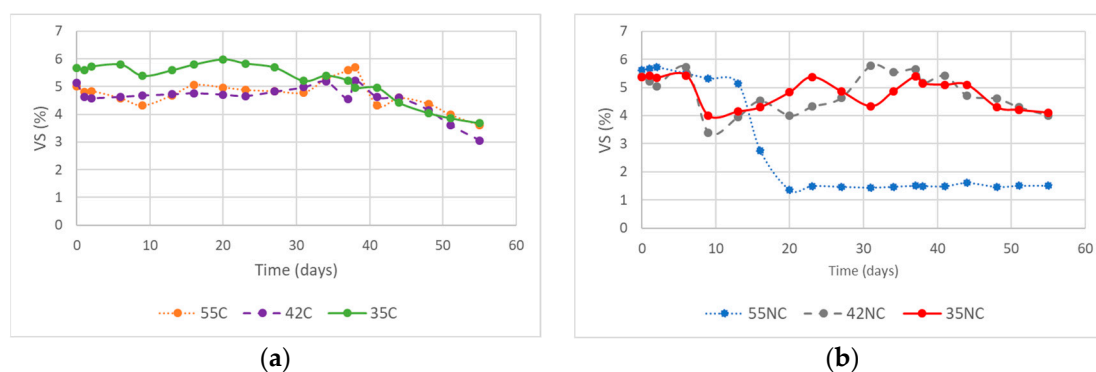

**Figure S3.** Evolution of volatile solids (VS, expressed as %) at thermophilic (55°C), intermediate (42°C) and mesophilic (35°C) temperature: a) chrome-tanned (C); b) chromium-free (NC) leather shavings.

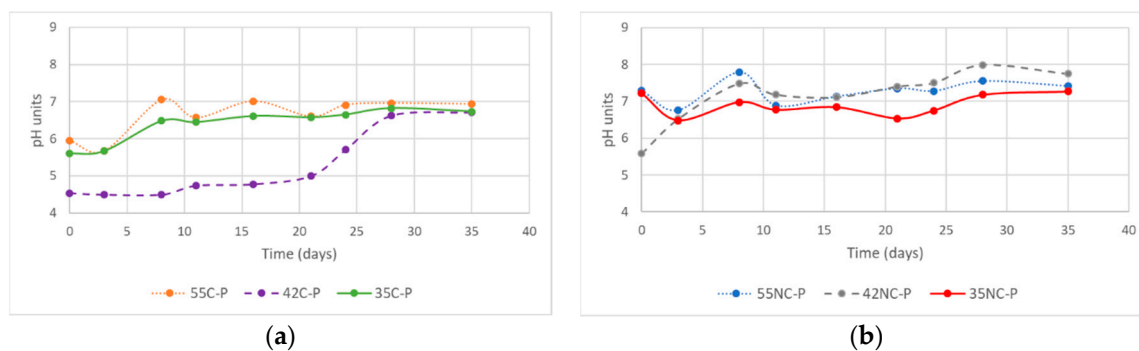

**Figure S4.** Evolution of pH at thermophilic (55°C), intermediate (42°C) and mesophilic (35°C) temperature regimes: a) chrome-tanned (C) and b) chromium-free (NC) pretreated leather shavings.

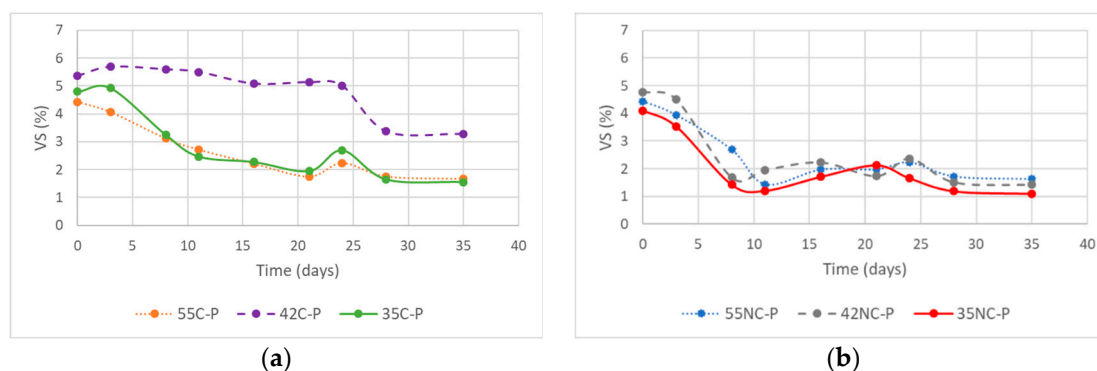

**Figure S5.** Evolution of volatile solids (VS, expressed as %) at thermophilic (55°C), intermediate (42°C) and mesophilic (35°C) temperature regime: a) chrome-tanned (C) and b) chromium-free (NC) pretreated leather shavings.
